# Supplementary material for: Evaluation of the stability of tyrosol esters duringin vitrogastrointestinal digestion
Source: Royal Society of Chemistry journal article supplement (doi:10.1039/c8fo00788h), 2018-01-01
Supplement: c8fo00788h1.pdf [file c8fo00788h1.pdf]

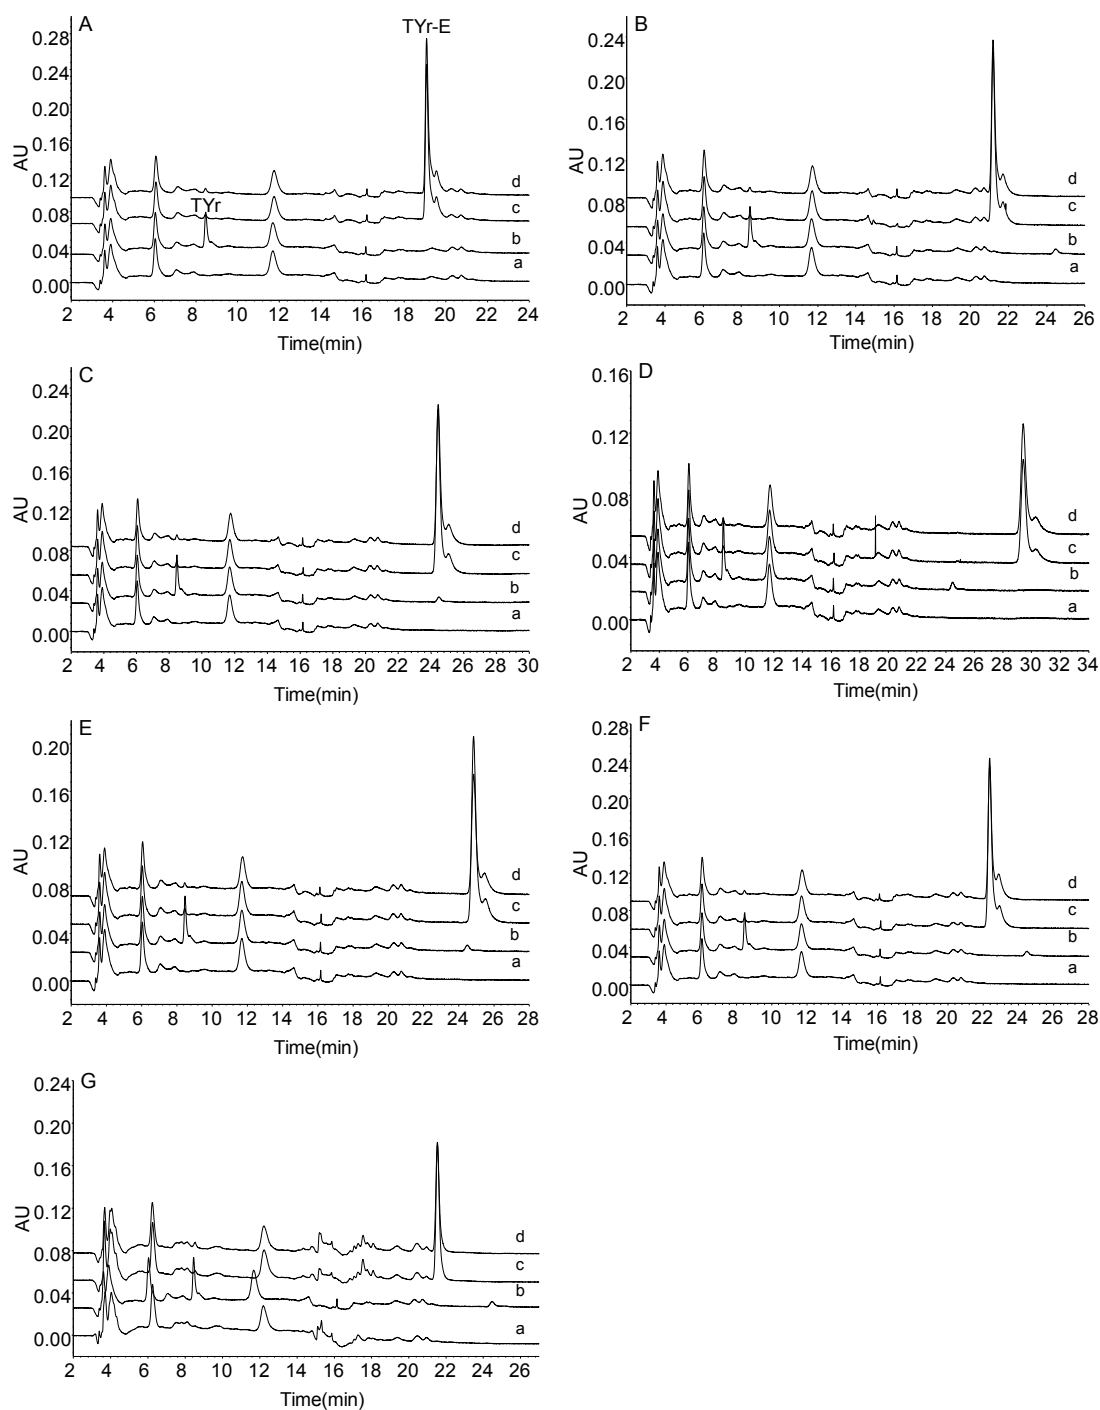

Fig.1S HPLC analysis of digestive stability of TYr-Es in simulated gastric fluid (SGF). A-G represent the digestive systems for T-C12:0, T-C14:0, T-C16:0, T-C18:0, T-C18:1, T-C18:2, and T-C22:6, respectively. a, blank SGF; b, SGF with TYr ; c, SGF with TYr-E (0 min); d, SGF with TYr-E (120 min).
