# Supplementary material for: Evaluation of the stability of tyrosol esters duringin vitrogastrointestinal digestion
Source: Royal Society of Chemistry journal article supplement (doi:10.1039/c8fo00788h), 2018-01-01
Supplement: c8fo00788h2.pdf [file c8fo00788h2.pdf]

Table 1S

Tyrosol determination of simulated intestinal fluid with known concentrations of added tyrosol by the HPLC method.

| $C_{(\text{TYR})}$ added ( $\mu\text{M}$ ) | $C_{(\text{TYR})}$ founded ( $\mu\text{M}$ ) | Accuracy (%) | Intraday coefficient variations (%) | Interday coefficient variations (%) |
|--------------------------------------------|----------------------------------------------|--------------|-------------------------------------|-------------------------------------|
| 5.00                                       | $5.20 \pm 0.50$                              | 104.6        | 10.1                                | 11.7                                |
| 50.00                                      | $49.35 \pm 0.73$                             | 98.8         | 5.9                                 | 7.3                                 |
| 100.00                                     | $93.57 \pm 0.94$                             | 94.6         | 9.5                                 | 9.9                                 |
